# Supplementary material for: Direct recognition of hepatocyte-expressed MHC class I alloantigens is required for tolerance induction
Source: JCI journal article supplement (doi:10.1172/jci.insight.97500), 2018-08-08
Supplement: sd1 [file 1]

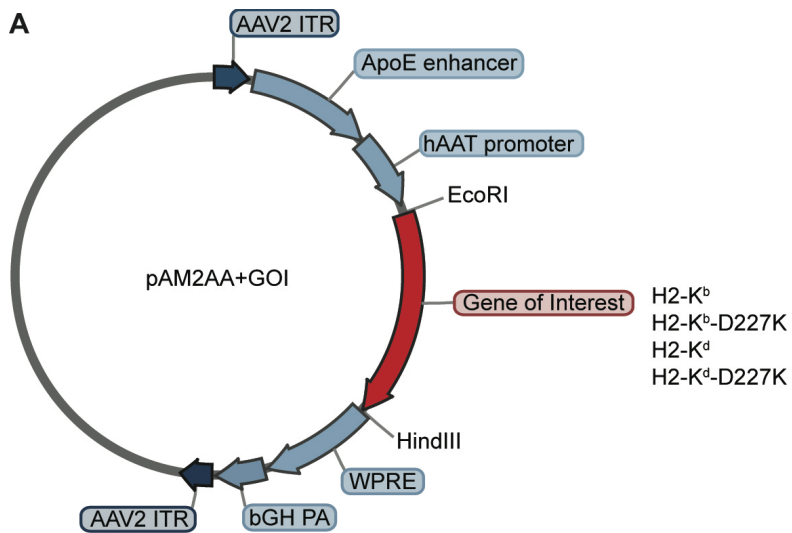

**Supplementary Figure 1. Features of AAV vectors encoding MHC class I molecules.** (A) Constructs encoding AAV2 inverted terminal repeats (ITRs), genes of interest and regulatory elements were packaged into an AAV8 capsid (AAV2/8 vector). ApoE = apolipoprotein E, hAAT = human alpha-1 antitrypsin, WPRE = woodchuck hepatitis virus post-transcriptional regulatory element, bGH PA = bovine growth hormone polyadenylation signal. (B and C) Alignment of K<sup>b</sup> or K<sup>d</sup> sequences showing the aspartic acid (D) to lysine (K) mutation at position 227.

**B**

|            |                                                                                      |     |
|------------|--------------------------------------------------------------------------------------|-----|
| H2-Kb      | GPHSRLRYFVTAVSRPGLGEPRYMEVGYVDDTEFVRFSDAENPRYEPRARWMEQEGPEYWERETQKAKGNEQSFRVDLRT     | 80  |
| H2-KbD227K | GPHSRLRYFVTAVSRPGLGEPRYMEVGYVDDTEFVRFSDAENPRYEPRARWMEQEGPEYWERETQKAKGNEQSFRVDLRT     | 80  |
| H2-Kb      | LLGYYNQSKGGSHTIQVISGCEVGS DGRLLRGYQQYAYDGC DY IALNEDLKTWTAADMAALITKHKEQAGEAERL RAYL  | 160 |
| H2-KbD227K | LLGYYNQSKGGSHTIQVISGCEVGS DGRLLRGYQQYAYDGC DY IALNEDLKTWTAADMAALITKHKEQAGEAERL RAYL  | 160 |
| H2-Kb      | EGTCVEWLRRLYLKNGNATLLRTDSPKAHVTHHSRPE DKVTLRCWALGFYPADITLTLWQLNGEELIQD MELVETRPAGDGT | 240 |
| H2-KbD227K | EGTCVEWLRRLYLKNGNATLLRTDSPKAHVTHHSRPE DKVTLRCWALGFYPADITLTLWQLNGEELIQK MELVETRPAGDGT | 240 |
| H2-Kb      | FQKWASVVVPLGKEQYTTCHVYHQGLPEPLTLRWE PFPSTVSNMATVAVLVVLGAAIVTGAVVAFVMKMR RNTGGKGGD    | 320 |
| H2-KbD227K | FQKWASVVVPLGKEQYTTCHVYHQGLPEPLTLRWE PFPSTVSNMATVAVLVVLGAAIVTGAVVAFVMKMR RNTGGKGGD    | 320 |
| H2-Kb      | YALAPGSQTS DLSLPDCKVMVHDPHSLA                                                        | 348 |
| H2-KbD227K | YALAPGSQTS DLSLPDCKVMVHDPHSLA                                                        | 348 |

**C**

|            |                                                                                       |     |
|------------|---------------------------------------------------------------------------------------|-----|
| H2-Kd      | GPHSRLRYFVTAVSRPGLGEP RFI AVGYVDDTQFVRFSDADNPRFEPRAPWMEQEGPEY WEEQTQRAKSDEQWFRVSLRT   | 80  |
| H2-KdD227K | GPHSRLRYFVTAVSRPGLGEP RFI AVGYVDDTQFVRFSDADNPRFEPRAPWMEQEGPEY WEEQTQRAKSDEQWFRVSLRT   | 80  |
| H2-Kd      | AQRYYNQSKGGSHTFQRMFGCDVGS DWRLLRGYQQFAYDGRDY IALNEDLKTWTAADTAALITRRKWEQAGDAEYYRAYL    | 160 |
| H2-KdD227K | AQRYYNQSKGGSHTFQRMFGCDVGS DWRLLRGYQQFAYDGRDY IALNEDLKTWTAADTAALITRRKWEQAGDAEYYRAYL    | 160 |
| H2-Kd      | EGECVEWLRRLYLELGNETLLRTDSPKAHVTYHPRS QVDVTLRCWALGFYPADITLTLWQLNGEDLTQD MELVETRPAGDGT  | 240 |
| H2-KdD227K | EGECVEWLRRLYLELGNETLLRTDSPKAHVTYHPRS QVDVTLRCWALGFYPADITLTLWQLNGEDLTQK MELVETRPAGDGT  | 240 |
| H2-Kd      | FQKWA AVVVPLGKEQNYTCHVHHKGLPEPLTLRWKLP PSTVSNVTVI IAVLVVLGAAIVTGAVVAFVMKMR RNTGGKGVNY | 320 |
| H2-KdD227K | FQKWA AVVVPLGKEQNYTCHVHHKGLPEPLTLRWKLP PSTVSNVTVI IAVLVVLGAAIVTGAVVAFVMKMR RNTGGKGVNY | 320 |
| H2-Kd      | ALAPGSQTS DLSLPDGKVMVHDPHSLA                                                          | 347 |
| H2-KdD227K | ALAPGSQTS DLSLPDGKVMVHDPHSLA                                                          | 347 |

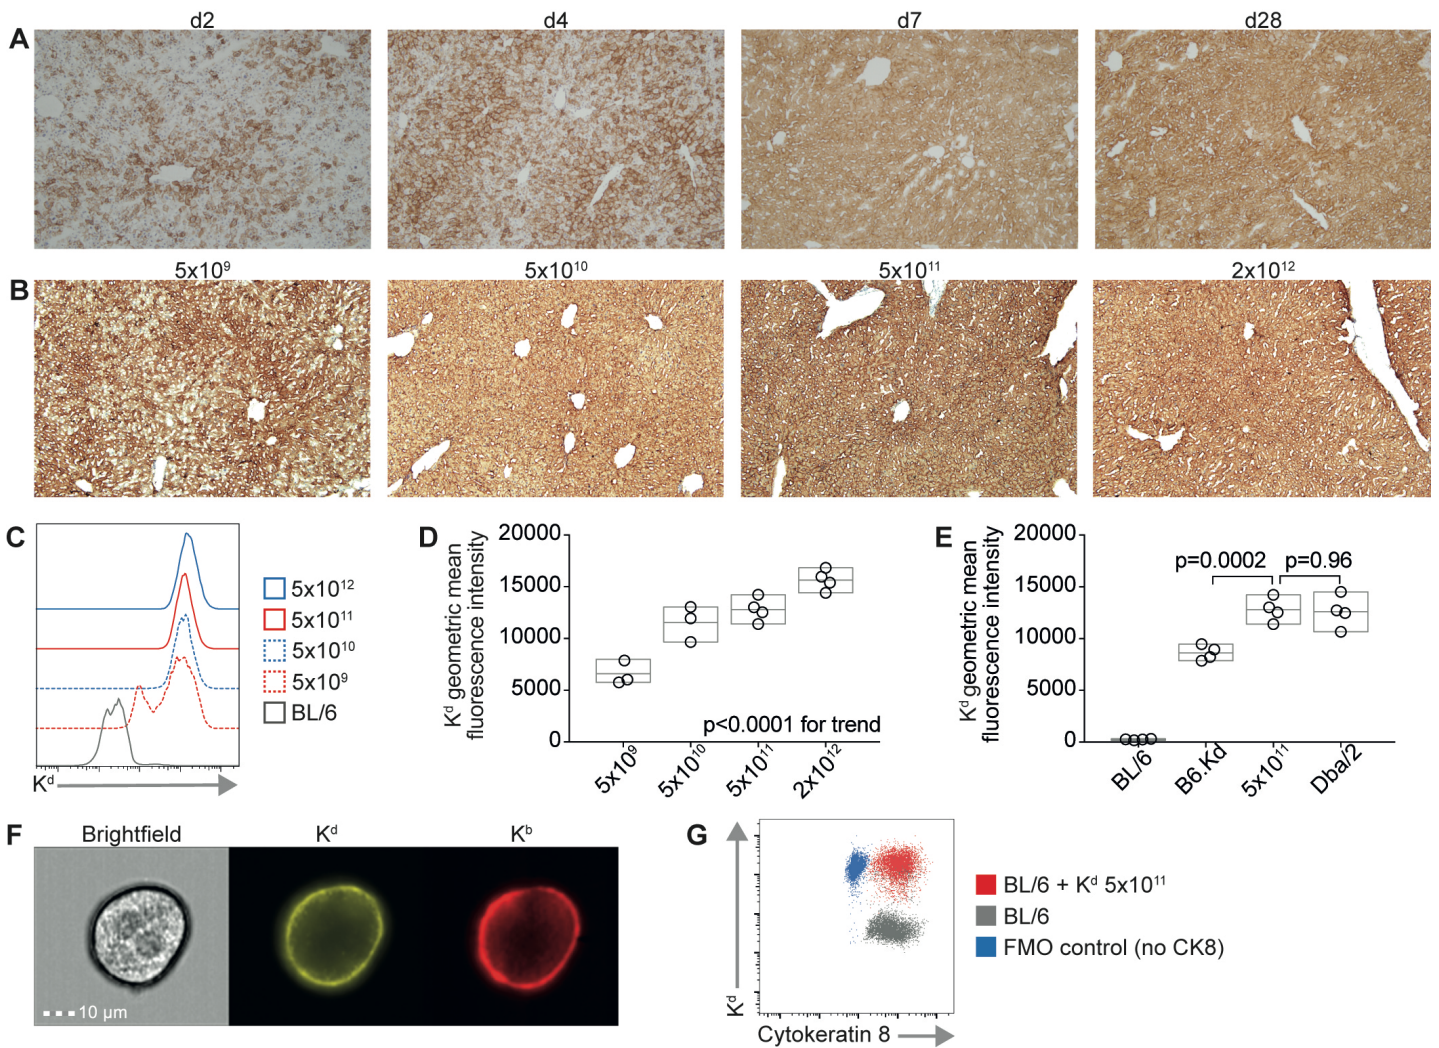

**Supplementary Figure 2. In vivo expression of  $K^d$  in livers of mice transduced with AAV- $K^d$ .** (A) C57BL/6 mice ( $n=3$ /group) were inoculated with  $5 \times 10^{11}$  vgc AAV- $K^d$ . Livers were collected at intervals from 2-28 days post-injection, and frozen sections were stained for  $K^d$  expression. Strong expression of  $K^d$  in hepatocytes was noted from d2 onwards, and was near-maximal by d7. Representative images are shown. Magnification=200x. The extent of  $K^d$  expression on C57BL/6 hepatocytes at d7 following transduction with AAV- $K^d$  at doses ranging from  $5 \times 10^9$  to  $2 \times 10^{12}$  vgc was assessed using immunostaining of liver sections (200x) (B) and flow cytometry on isolated hepatocytes (C-D). 100% of hepatocytes expressed H-2 $K^d$  at doses of  $5 \times 10^{10}$  and above, with a trend towards increasing intensity of  $K^d$  surface expression as the vector dose was raised ( $n=3$ ,  $p < 0.0001$ , statistical analysis by one-way ANOVA with post-test for linear trend). At a vector dose of  $5 \times 10^{11}$  vgc AAV- $K^d$ , surface expression of  $K^d$  on transduced C57BL/6 hepatocytes was equivalent to the expression of native  $K^d$  on hepatocytes of the d-haplotype mouse strain Dbal/2, and was greater than the expression of  $K^d$  on hepatocytes from the transgenic B6.Kd donor strain (E). In panels D-E, boxes show min to max, with a line at the mean,  $n=3-4$ /group. Isolated hepatocytes from C57BL/6 mice transduced with AAV- $K^b$  were examined by imaging flow cytometry using the AMNIS ImageStream. Transduced cells show typical hepatocyte morphology on the brightfield image, and express both the native MHC class I H-2 $K^b$  and the H-2 $K^d$  transgene product (F). Moreover, isolated transduced cells stain positive for the hepatocyte marker cytochrome-8 (G). A fluorescence minus one (FMO) control, where cytochrome-8 staining was omitted, is also shown in this panel.



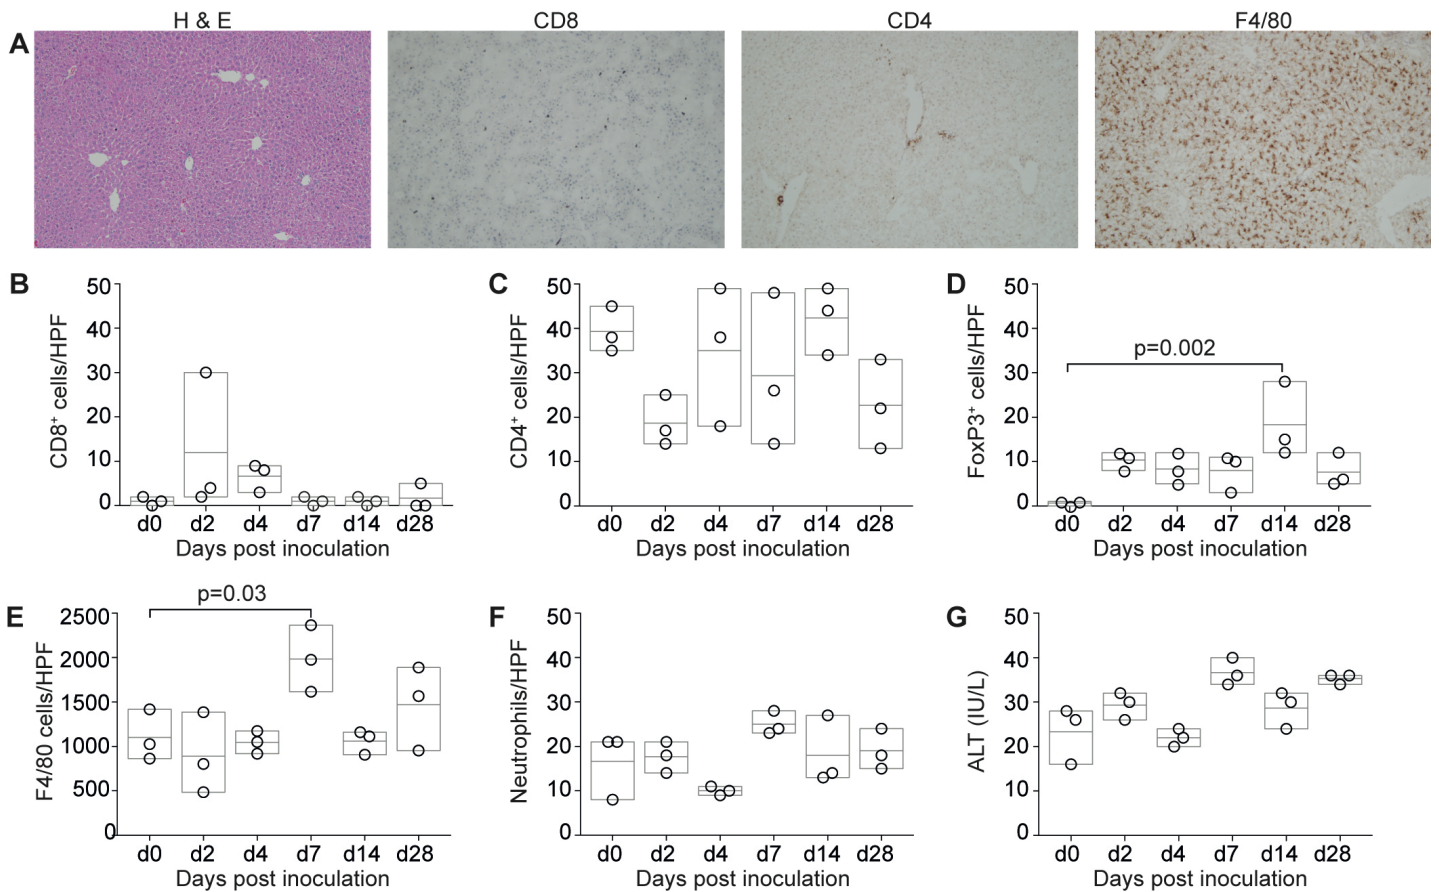

**Supplementary Figure 3. Inoculation of C57BL/6 mice with AAV-K<sup>d</sup> does not result in liver inflammation.** Liver sections from mice transduced with  $5 \times 10^{11}$  vgc AAV-K<sup>d</sup> were stained with Haematoxylin and Eosin, and with antibodies against various leucocyte markers (**A-F**, supplementary table 1). Liver morphology was normal in transduced mice (**A**). Only small numbers of infiltrating CD8<sup>+</sup> T cells (**B**), CD4<sup>+</sup> T cells (**C**), and Ly6B.2<sup>+</sup> neutrophils (**F**) were detected by immunostaining. The number of FoxP3<sup>+</sup> T cells increased from  $0.7 \pm 0.3$  cells/HPF in normal C57BL/6 mice to  $18.3 \pm 4.9$  cells/HPF at d14 after vector inoculation,  $p=0.002$ . F4/80-expressing Kupffer cells are plentiful in the livers of normal C57BL/6 mice ( $1102 \pm 165$  cells/HPF), and greater numbers of F4/80 expressing cells were observed on d7 post-transduction ( $1985 \pm 216$  cells/HPF,  $p=0.03$ ). Alanine aminotransferase levels in serum (**G**) remained within the normal range for C57BL/6 mice. ( $n=3$ /group for all panels **B-G**, representative images are shown in **A**, magnification=200x. Boxes in **B-G** show min to max, with a line at the mean. Data are given as mean  $\pm$  SEM. Statistical analysis employed one-way ANOVA, followed by Dunnett's multiple comparisons test.

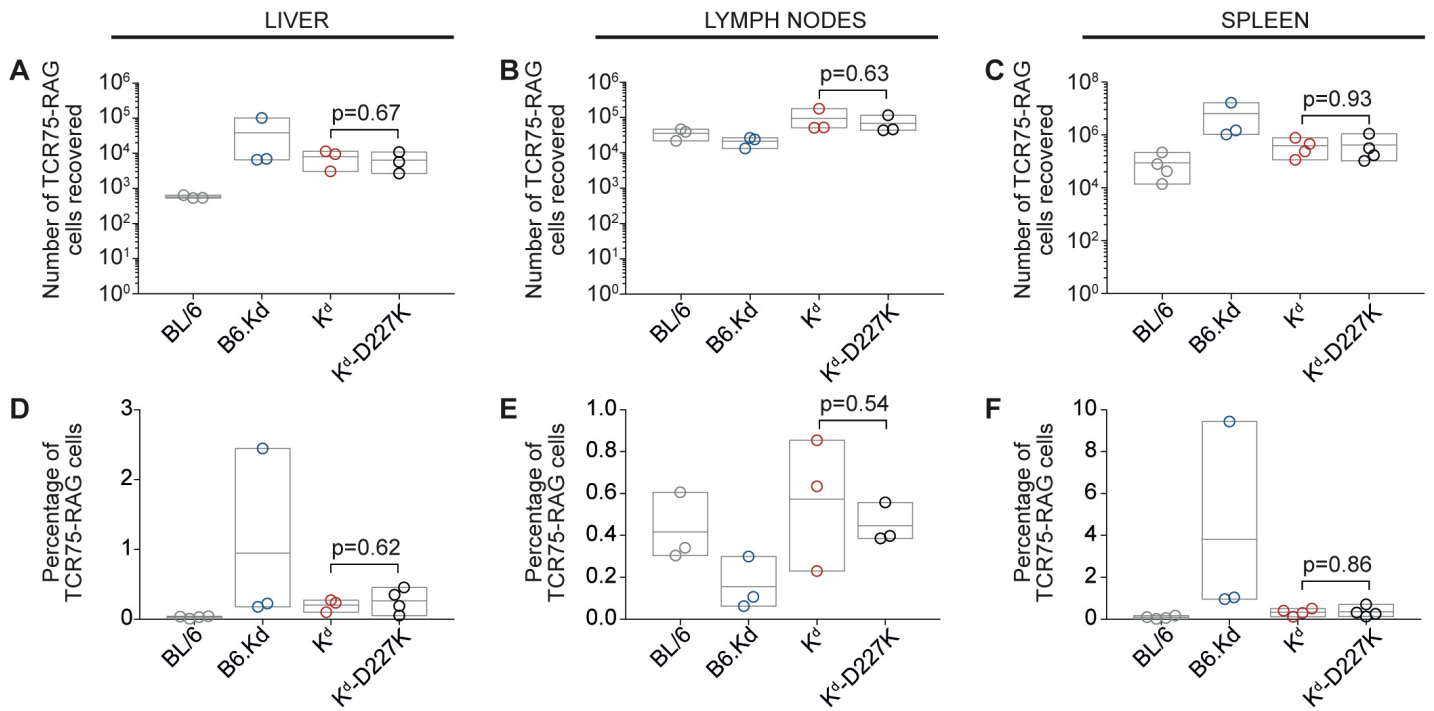

**Supplementary Figure 4. Recovery of adoptively-transferred TCR75-RAG T cells from mice inoculated with AAV-K<sup>d</sup> or K<sup>d</sup>-D227K.** (A) Very few TCR75-RAG T cells ( $572 \pm 35$ , identified by co-expression of CD4 and the congenic marker CD45.1) could be recovered from the liver of control C57BL/6 mice at 72 hours following adoptive transfer. In contrast,  $>6000$  CD4<sup>+</sup>CD45.1<sup>+</sup> cells were recovered from the livers of B6.Kd mice or those of C57BL/6 mice inoculated with either AAV-K<sup>d</sup> or K<sup>d</sup>-D227K. There was no significant difference between recovery of transferred cells from mice in the K<sup>d</sup> and K<sup>d</sup>-D227K groups ( $8020 \pm 2540$  v/s  $6413 \pm 2380$ ,  $p=0.67$ ). (B) Recovery of transferred TCR75-RAG T cells from the draining LN did not differ between mice transduced with K<sup>d</sup> or K<sup>d</sup>-D227K vectors ( $94743 \pm 42373$  v/s  $69223 \pm 23987$ ,  $p=0.63$ ), similarly  $3.96 \times 10^5 \pm 1.46 \times 10^5$  TCR75-RAG cells were recovered from spleens of the K<sup>d</sup> group (C), compared with  $4.22 \times 10^5 \pm 2.29 \times 10^5$  from spleens of the K<sup>d</sup>-D227K-expressing mice ( $p=0.93$ ). As for the absolute numbers, the proportion of TCR75-RAG cells (expressed as the percentage of all live leucocytes) present in each organ did not differ between mice treated with AAV-K<sup>d</sup> and K<sup>d</sup>-D227K. In the liver, TCR75-RAG cells comprised  $0.20 \pm 0.05\%$  of leucocytes in K<sup>d</sup>-expressing mice, compared with  $0.26 \pm 0.09\%$  in mice transduced with AAV-K<sup>d</sup>-D227K,  $p=0.62$ . In draining LN, these proportions were  $0.57 \pm 0.18\%$  compared with  $0.44 \pm 0.06\%$ ,  $p=0.54$ , and in spleen, TCR75-RAG cells formed  $0.33 \pm 0.08\%$  of leucocytes from AAV-K<sup>d</sup>-treated mice v/s  $0.36 \pm 0.13\%$ ,  $p=0.86$ , in the K<sup>d</sup>-D227K group.  $n=3-4$  per group, boxes show min to max, with a line at the mean. Recovery of TCR75-RAG cells from mice treated with either AAV-K<sup>d</sup> or AAV-K<sup>d</sup>-D227K was compared using unpaired T-tests. Data are described as mean  $\pm$  SEM.



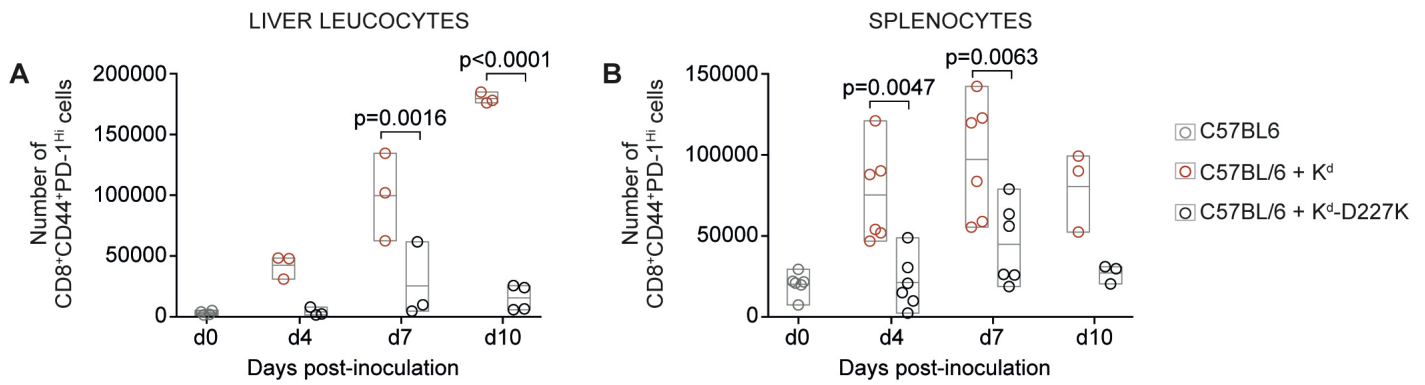

**Supplementary Figure 5. Increased numbers of activated CD8<sup>+</sup>T cells are present in liver and spleen following inoculation with AAV-K<sup>d</sup>.** CD8<sup>+</sup> T cells were isolated from liver and spleen at intervals ranging between 4 and 10 days following inoculation of C57BL/6 mice with AAV-K<sup>d</sup> or K<sup>d</sup>-D227K. **(A)** The number of activated CD8<sup>+</sup> T cells (CD44<sup>+</sup>PD-1<sup>Hi</sup>) in the liver peaked on d10 after injection with AAV-K<sup>d</sup>. There were significantly more activated CD8<sup>+</sup> T cells in the livers of AAV-K<sup>d</sup>-transduced mice than in those of mice transduced with the K<sup>d</sup>-D227K vector, both on d7 ( $9.97 \times 10^4 \pm 2.1 \times 10^4$  v/s  $2.5 \times 10^4 \pm 1.8 \times 10^4$ ,  $p=0.0016$ ) and d10 ( $1.8 \times 10^5 \pm 0.27 \times 10^5$  v/s  $1.6 \times 10^4 \pm 0.5 \times 10^4$ ,  $p<0.0001$ ).  $n=3-4$ /group. **(B)** Activated CD8<sup>+</sup> T cells in the spleens of AAV-K<sup>d</sup> treated mice outnumbered those in the spleens of mice receiving AAV-K<sup>d</sup>-D227K on both d4 ( $7.5 \times 10^4 \pm 1.2 \times 10^4$  v/s  $2.1 \times 10^4 \pm 6.8 \times 10^3$ ) and d7 ( $9.7 \times 10^4 \pm 1.5 \times 10^4$  v/s  $4.5 \times 10^4 \pm 1.0 \times 10^4$ ) post-inoculation.  $n=3-6$ /group. Statistical analysis for panels **A** and **B** was carried out using two-way ANOVA followed by Sidak's and Tukey's multiple comparisons tests. Box shows min to max, with a line at the mean. Data are described as mean $\pm$ SEM.

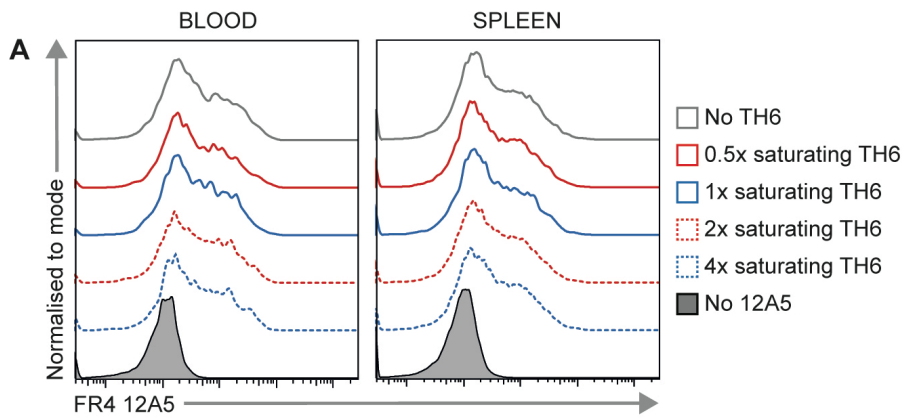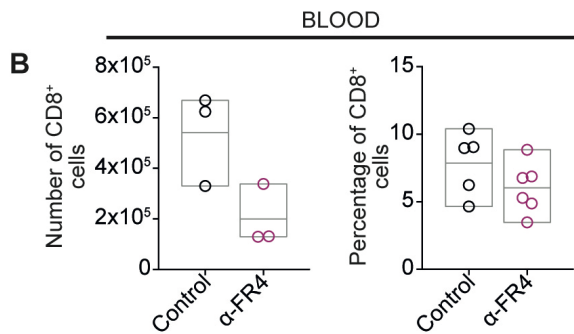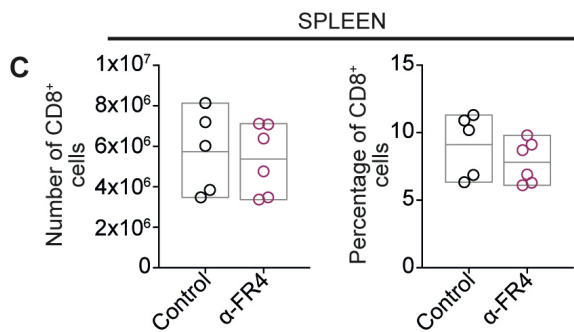

**Supplementary Figure 6. Anti-FR4 antibody clone TH6 does not compete with 12A5 for binding to CD4<sup>+</sup> T cells.** (A) In order to determine whether the depleting monoclonal antibody TH6 bound to the surface of FR4<sup>+</sup> T cells would compete with the detection antibody 12A5 for binding, we isolated 10<sup>6</sup> PBMC or splenocytes and stained them with both antibodies simultaneously. The concentration of 12A5 was kept constant, while concentrations of TH6 varied between 0.5x saturating and 4x saturating for 10<sup>6</sup> cells. The geometric mean fluorescence intensity for 12A5 staining gated on CD3<sup>+</sup>CD4<sup>+</sup> T cells did not change appreciably as the concentration of TH6 increased, indicating that TH6 did not interfere with 12A5 binding. Neither the number nor the proportion of CD8<sup>+</sup> T cells in the peripheral blood (B) or spleen (C) of B10.BR mice was significantly altered following treatment with the anti-FR4 monoclonal antibody TH6. Boxes show min to max, with a line at the mean. Statistical analysis for B-C was performed using an unpaired T test.

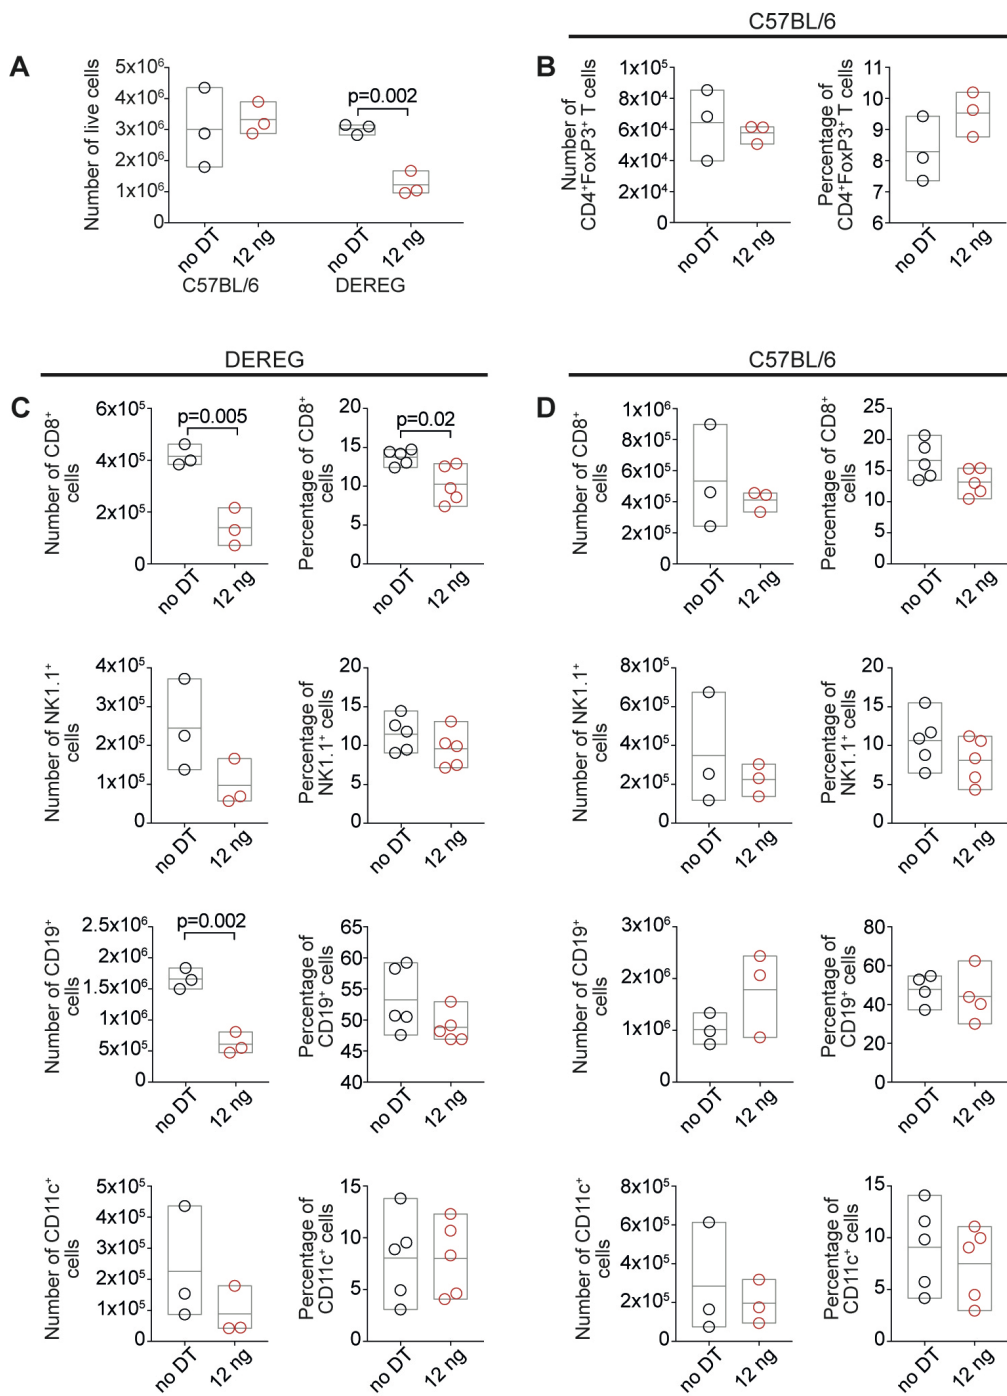

**Supplementary Figure 7. Effect of Diphtheria Toxin treatment on cell subsets in C57BL/6 and DEREK peripheral blood.** Peripheral blood samples from C57BL/6 or DEREK mice (n=3-5/group), either untreated, or injected with 12ng/g DT ip on 3 consecutive days were analysed by flow cytometry to determine the number and proportions of various leucocyte subsets. C57BL/6 samples were not affected by the DT treatment. In DEREK mice (**A**), there was an overall reduction in the total number of live cells recovered from peripheral blood ( $1.23 \times 10^6 \pm 2.26 \times 10^5$  compared with  $3.03 \times 10^6 \pm 1.0 \times 10^5$  in control mice,  $p=0.002$ ). The absolute number of CD8<sup>+</sup> T cells fell from  $4.15 \times 10^5 \pm 2.39 \times 10^4$  to  $1.4 \times 10^5 \pm 4.2 \times 10^4$  ( $p=0.005$ , **D**) and this was mirrored by a decline in the fraction of CD8<sup>+</sup> T cells from  $13.73 \pm 0.44\%$  to  $10.24 \pm 1.08\%$ ,  $p=0.02$  (**E**). The number of CD19<sup>+</sup> cells in blood was reduced in DT-treated DEREK mice ( $6.1 \times 10^5 \pm 1.0 \times 10^5$  v/s  $1.66 \times 10^6 \pm 9.77 \times 10^4$  in controls,  $p=0.002$ , **L**) though there were no significant differences between the proportions of CD19<sup>+</sup> cells in these groups (**M**). Data are described as mean  $\pm$  SEM, and unpaired T tests were used for all statistical analyses.



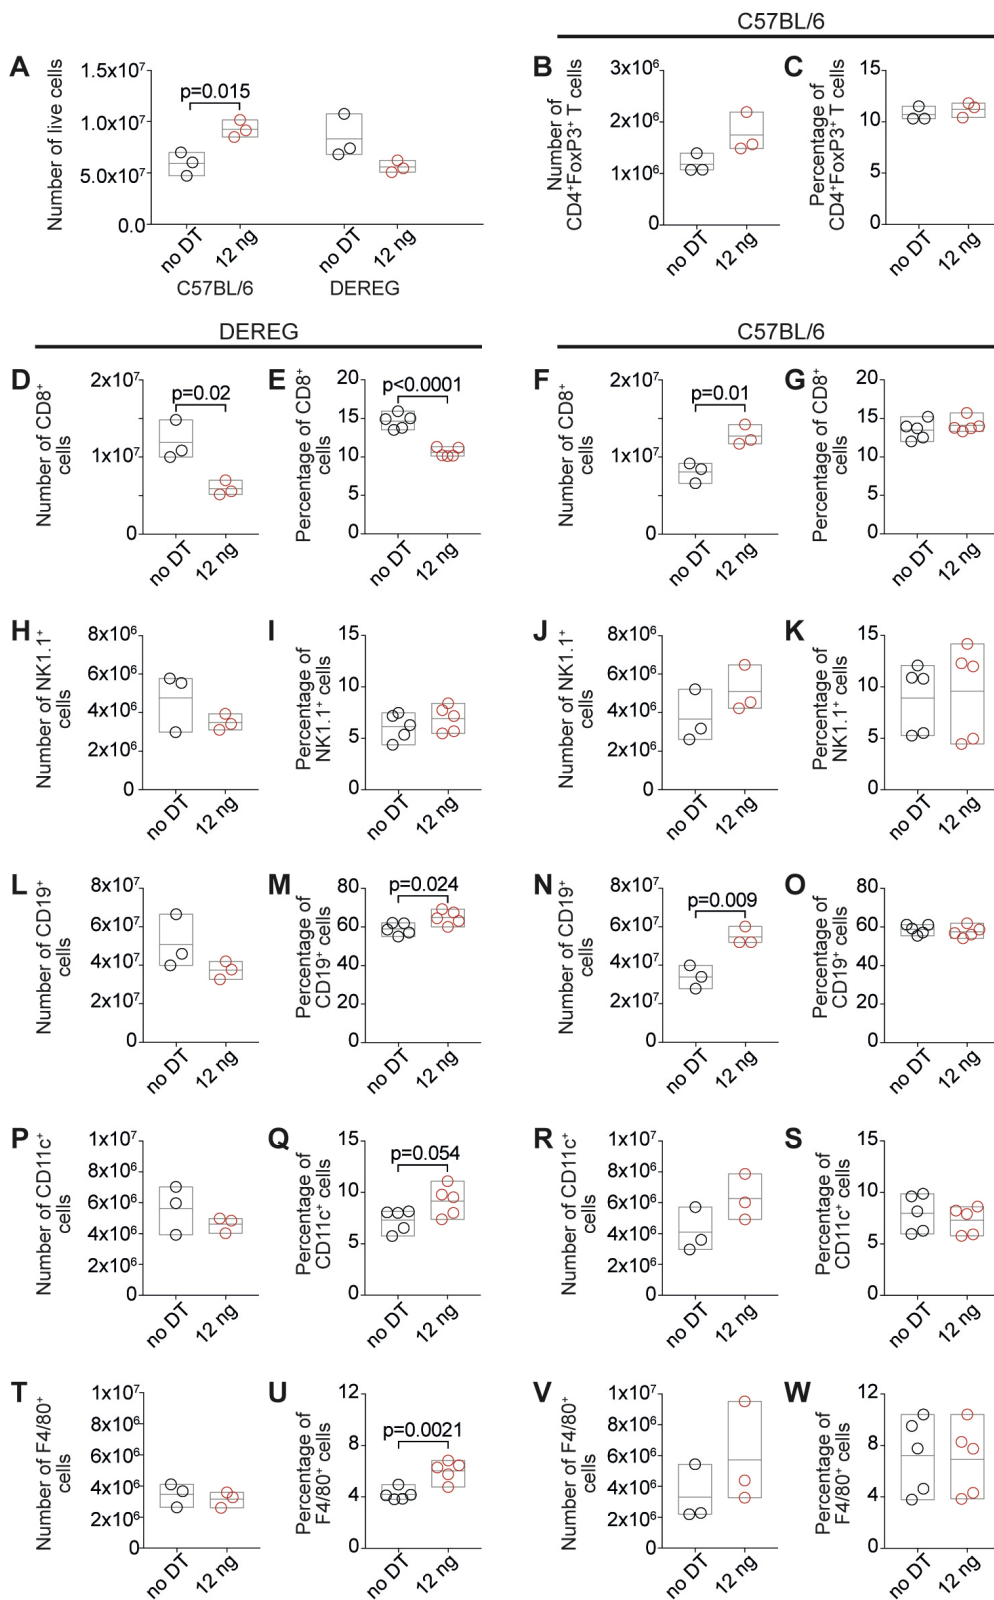

**Supplementary Figure 8. Effect of Diphtheria Toxin treatment on cell subsets in C57BL/6 and DEREK spleen.** Splenocyte samples from C57BL/6 or DEREK mice ( $n=3-5$ /group), either untreated, or injected with 12ng/g DT ip on 3 consecutive days were analysed by flow cytometry to determine the number and proportions of various leucocyte subsets. There was an overall increase in the number of live cells in DT-treated C57BL/6 mice ( $9.27 \times 10^7 \pm 4.85 \times 10^6$  against  $5.92 \times 10^7 \pm 6.57 \times 10^6$  in controls,  $p=0.015$ , **A**). The total number of cells recovered from DEREK spleens was not significantly altered by DT treatment (**A**). In C57BL/6 mice, neither the numbers (**B**) nor the proportion (**C**) of CD4<sup>+</sup>FoxP3<sup>+</sup> T cells changed significantly in response to DT administration. The numbers of CD8<sup>+</sup> (**F**) and CD19<sup>+</sup> (**N**) cells were increased by DT treatment, reflecting the overall increase in spleen cell numbers in DT-treated mice, but these changes were not accompanied by a corresponding increase in the percentage of these cell types (**G** and **O**). In DEREK spleen, the absolute number and proportion of CD8<sup>+</sup> cells was reduced by DT administration (**D** and **E**) while the proportion but not the number, of CD19<sup>+</sup> (**L**, **M**), CD11c<sup>+</sup> (**P**, **Q**), and F4/80<sup>+</sup> (**T**, **U**) cells increased. Boxes show min to max, with a line at the mean. Data are described as mean  $\pm$  SEM, and unpaired T tests were used for all statistical analyses.

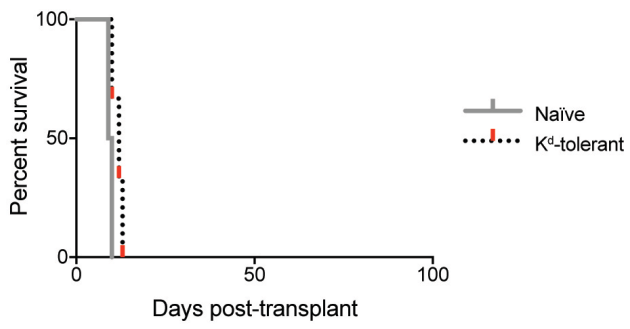

**Supplementary Figure 9. Survival of Fully-mismatched Db<sub>a</sub>/2 (H-2<sup>d</sup>) skin grafts is not prolonged in K<sup>d</sup>-tolerant C57BL/6 recipients.** To determine whether Tregs generated in response to either direct presentation of K<sup>d</sup> or indirect presentation of K<sup>d</sup>-derived peptides could mediate linked suppression of responses to other d-haplotype alloantigens, full haplotype mismatched Db<sub>a</sub>/2 skin grafts (H-2<sup>d</sup>) were applied to K<sup>d</sup>-tolerant C57BL/6 mice which had accepted B6.Kd skin grafts for more than 100 days following AAV-K<sup>d</sup> inoculation, or to naïve C57BL/6 recipients. No survival prolongation was observed in K<sup>d</sup>-tolerant mice.

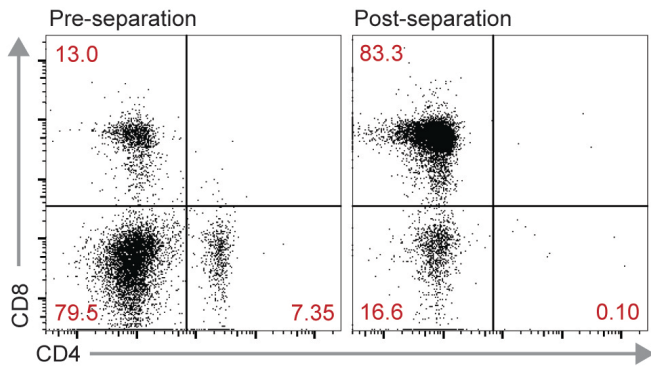

**Supplementary Figure 10. CD8 enrichment prior to ELISpot assay.** Prior to some ELISpot assays, CD8-enrichment of pooled, unfractionated splenocytes was carried out by negative bead selection using a CD8  $\alpha^+$  T Cell Isolation Kit and autoMACS Pro Separator (both, Miltenyi Biotec, Germany). CD8-enriched T cells from unprimed C57BL/6 mice and primed mice without AAV inoculation or transduced with either AAV-K<sup>d</sup> or AAV-K<sup>d</sup>-D227K (3 samples/group, each pooled from 3 mice/sample) were used as responder cells. Pre and post-separation, splenocytes were stained with antibodies against CD4 and CD8, and examined by flow cytometry. A representative dot-plot showing the enrichment of CD8<sup>+</sup> and depletion of CD4<sup>+</sup> cells is shown.
